# Supplementary material
Source: PubMed Central journal article supplement (PMC1569157)

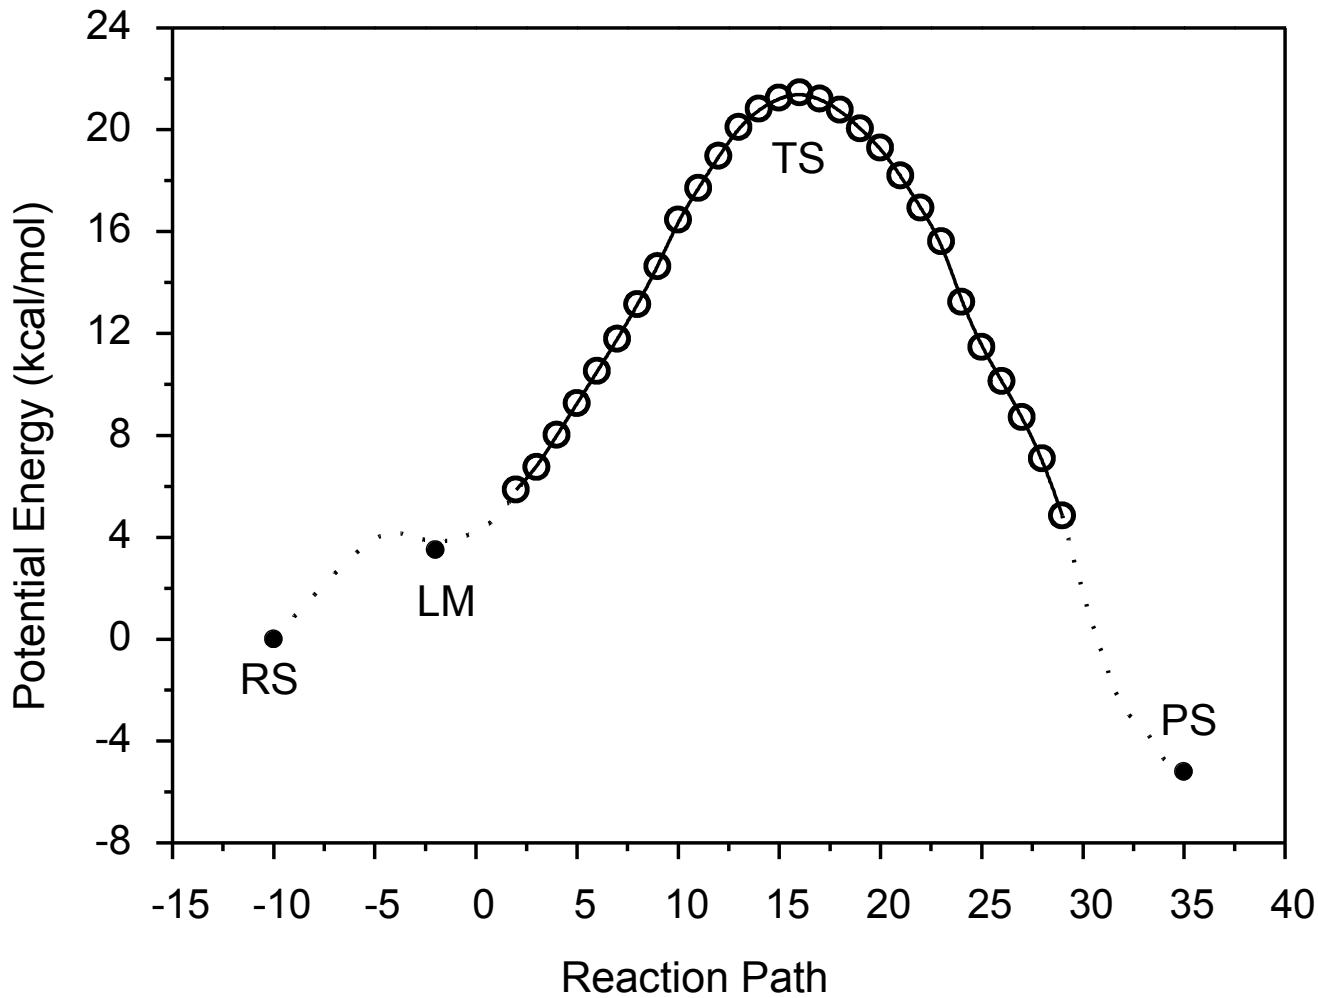

Supplement: pnas_0606006103_2.pdf [file pnas_0606006103_2.pdf]
